# Supplementary material for: Enhanced upconversion luminescence and optical thermometry in Er3+/Yb3+ heavily doped ZrO2 by stabilizing in the monoclinic phase
Source: Royal Society of Chemistry journal article supplement (doi:10.1039/d1qm00440a), 2021-01-01
Supplement: d1qm00440a1.pdf [file d1qm00440a1.pdf]

## Supplementary Information

### Enhanced upconversion luminescence and optical thermometry in $\text{Er}^{3+}/\text{Yb}^{3+}$ heavily doped $\text{ZrO}_2$ by stabilizing at the monoclinic phase

Kexiu Wang,<sup>a,b</sup> Hao Wu,<sup>\*a</sup> Guo-Hui Pan,<sup>\*a</sup> Huajun Wu,<sup>a</sup> Liangliang Zhang<sup>a</sup> and Jiahua Zhang<sup>\*a,b</sup>

<sup>a</sup> State Key Laboratory of Luminescence and Applications, Changchun Institute of Optics, Fine Mechanics and Physics, Chinese Academy of Sciences, Changchun 130033, China

<sup>b</sup> Center of Materials Science and Optoelectronics Engineering, University of Chinese Academy of Sciences, Beijing 100049, China

Corresponding author\*

E-mail: wuhao@ciomp.ac.cn, guohui.pan@aliyun.com, zhangjh@ciomp.ac.cn

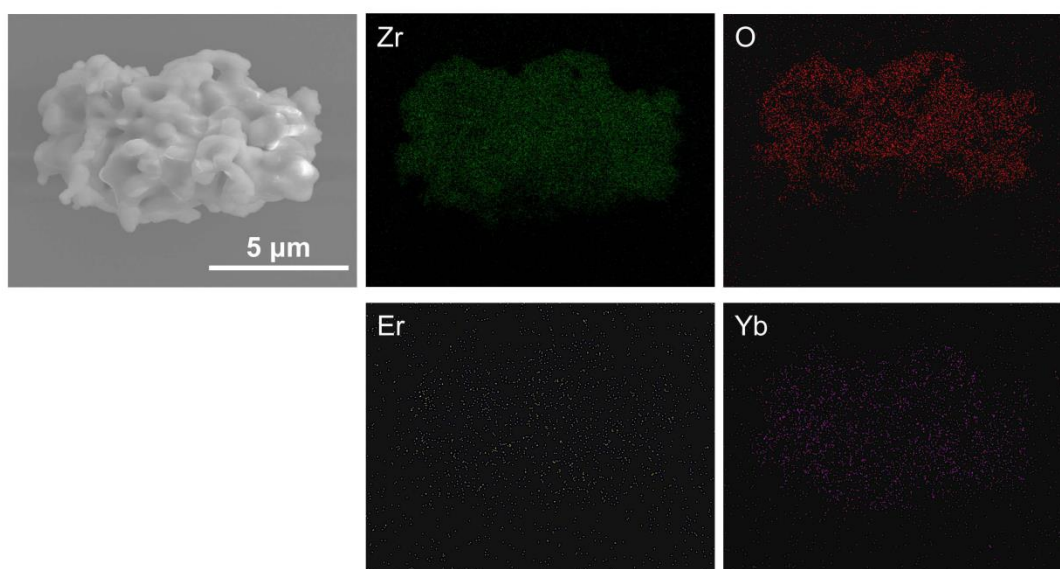

**Fig. S1** The SEM image and element mappings of c-ZrO<sub>2</sub>:2%Er<sup>3+</sup>, 14%Yb<sup>3+</sup>.

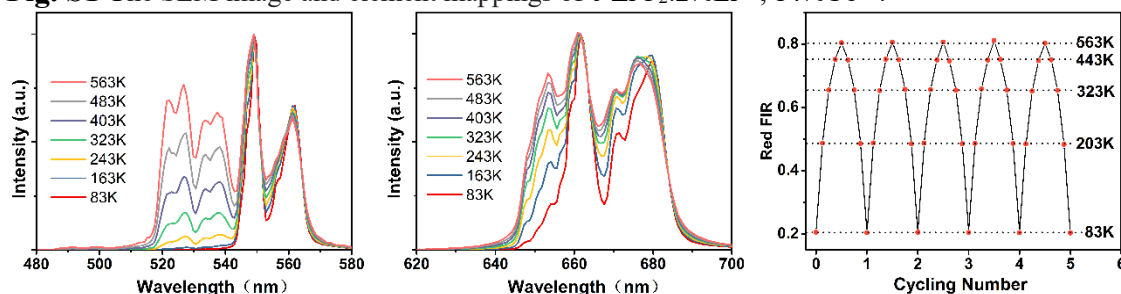

**Fig. S2** Temperature-dependent emission spectra of the m-ZrO<sub>2</sub>:2%Er<sup>3+</sup>, 9%Yb<sup>3+</sup> sample. The emission intensities at 549 and 662 nm are normalized, respectively. The red FIR plotted per cycle step. The dashed lines are the average values.

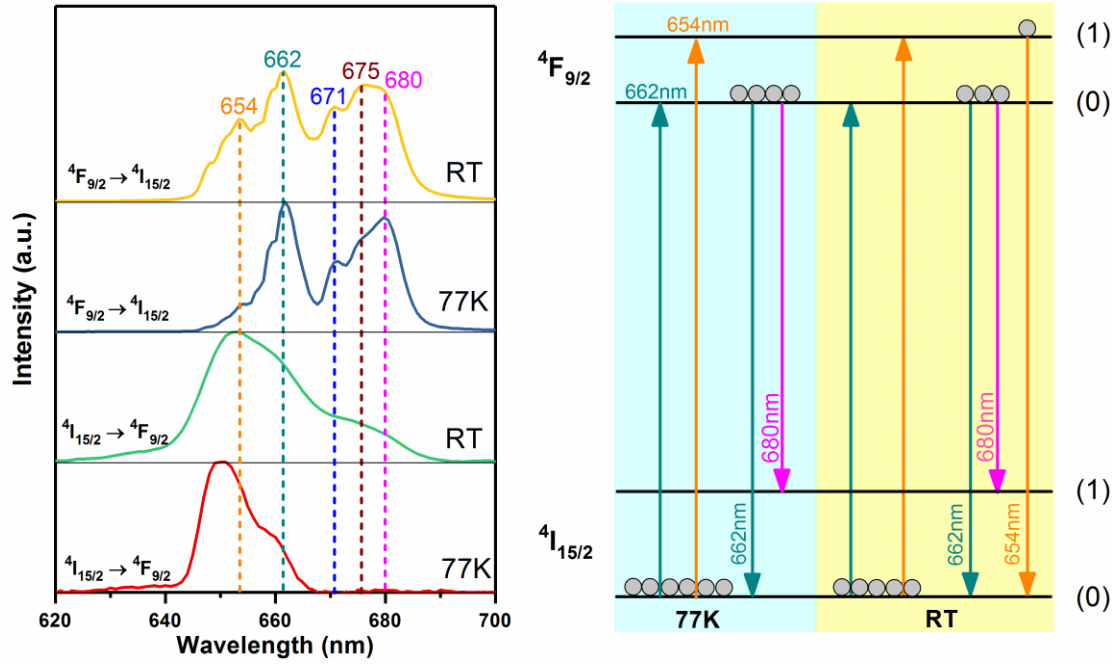

**Fig. S3** The excitation and emission spectra at liquid nitrogen temperature (77K) and room temperature (RT). Simplified Stark energy level diagram for the  $^4F_{9/2}$  and  $^4I_{15/2}$  states.

The temperature resolution  $\delta T$  can be quantified using

$$\delta T = \frac{1}{Sr} \frac{\delta FIR}{FIR} \quad (S1)$$

The estimation of  $\delta FIR/FIR$  can be obtained by <sup>1</sup>:

$$\frac{\delta FIR}{FIR} = \sqrt{\left(\frac{\delta I_1}{I_1}\right)^2 + \left(\frac{\delta I_2}{I_2}\right)^2} \quad (S2)$$

where  $\delta I_i/I_i$  ( $i=1, 2$ ) is the single-to-noise ratio value.

- (1) Q. Wang, M. Liao, Z. F. Mu, X. Zhang, H. F. Dong, Z. J. Liang, J. C. Luo, Y. Yang and F. G. Wu, Ratiometric Optical Thermometer with High Sensitivity Based on Site-Selective Occupancy of  $Mn^{2+}$  Ions in  $Li_5Zn_8Al_5Ge_9O_{36}$  under Controllable Synthesis Atmosphere. *J. Phys. Chem. C*, 2020, **124**, 886-895.
